# Supplementary material
Source: MDPI journal article supplement (https://www.mdpi.com/2072-4292/14/15/3782)
Supplement: s1 [file s1]

# Supplementary Materials: Mapping Dynamic Turbidity Maximum Zone of the Yellow River Estuary from 38 Years of Landsat Imagery

Maoxiang Chang <sup>1,2</sup>, Peng Li <sup>1,2,3,4\*</sup>, Yue Sun <sup>5</sup>, Houjie Wang <sup>1,2</sup> and Zhenhong Li <sup>6</sup>

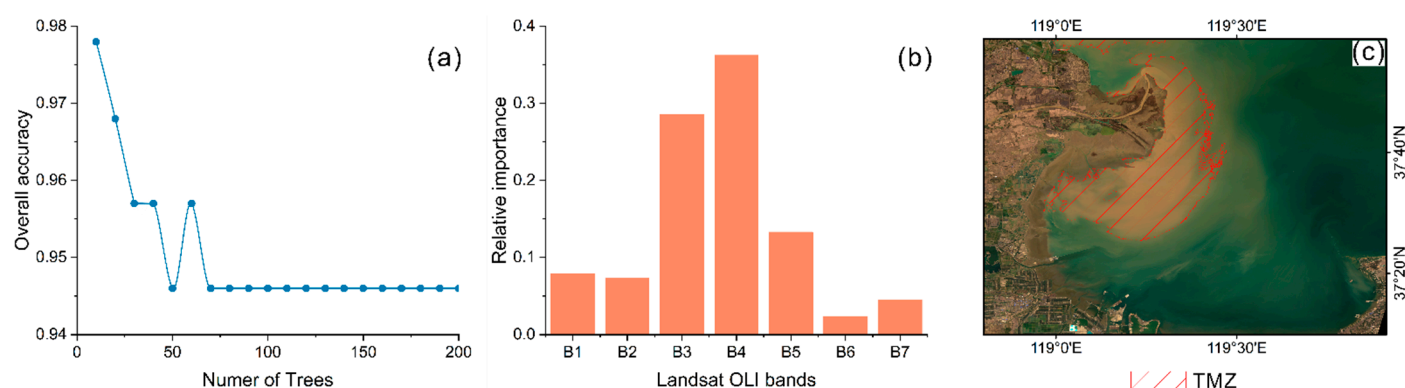

**Figure S1.** Results of the random forest (RF) classifier. (a) The overall accuracy changing with the number of classification trees; (b) the relative importance of Landsat OLI bands in the RF classification; (c) the derived TMZ extent using RF classifier. The Landsat OLI true color image was acquired on 14 March 2020. Land area in the image was clipped out in advance. 358 samples were selected by visually inspection and were labeled as ‘TMZ’ and ‘other’ with the number of 203 and 155, respectively. 70% of the samples were randomly selected for training and 30% for testing. The number of decision trees of RF was set to 10 in this study owing to its highest accuracy (a). The overall accuracy of the classification is 0.98 and the spatial extent of the derived TMZ is well consistent with the Landsat image (c). Thus, the result of RF TMZ mapping is reliable.

**Table S1.** Detailed information of images in Figure 5. Title ‘No.’ is the serial number of Landsat images in Figure 5, ‘Date’ is the acquisition date of images, and ‘OA’ is the overall accuracy calculated from validation samples of each image.

| No. | Sensor | Date              | OA    | No. | Sensor | Date              | OA     |
|-----|--------|-------------------|-------|-----|--------|-------------------|--------|
| 1   | TM     | 17 July 1984      | 97.4% | 16  | TM     | 2 September 2001  | 95.6%  |
| 2   | TM     | 7 May 1987        | 97.0% | 17  | ETM+   | 17 February 2002  | 93.7%  |
| 3   | TM     | 24 June 1987      | 91.7% | 18  | TM     | 24 September 2003 | 94.1%  |
| 4   | TM     | 9 March 1989      | 95.4% | 19  | TM     | 21 May 2004       | 99.1%  |
| 5   | TM     | 7 January 1990    | 98.8% | 20  | TM     | 22 April 2005     | 99.0%  |
| 6   | TM     | 24 August 1992    | 97.9% | 21  | TM     | 24 May 2005       | 98.6%  |
| 7   | TM     | 9 September 1992  | 96.7% | 22  | ETM+   | 16 March 2006     | 99.2%  |
| 8   | TM     | 10 March 1995     | 98.3% | 23  | TM     | 01 April 2009     | 93.8%  |
| 9   | TM     | 18 September 1995 | 99.3% | 24  | TM     | 03 May 2009       | 96.8%  |
| 10  | TM     | 22 1996           | 98.1% | 25  | ETM+   | 23 August 2012    | 97.9%  |
| 11  | TM     | 11 February 1997  | 97.0% | 26  | OLI    | 05 October 2013   | 98.7%  |
| 12  | TM     | 25 August 1998    | 99.1% | 27  | OLI    | 25 January 2014   | 97.8%  |
| 13  | TM     | 6 April 1999      | 97.4% | 28  | OLI    | 03 October 2018   | 100.0% |
| 14  | ETM+   | 28 February 2000  | 95.2% | 29  | OLI    | 23 January 2019   | 99.3%  |
| 15  | TM     | 8 April 2000      | 98.6% | 30  | OLI    | 19 August 2019    | 98.2%  |
